# Supplementary material
Source: PubMed Central journal article supplement (PMC4016958)
Supplement: NIHMS459296-supplement-supp_info.pdf [file NIHMS459296-supplement-supp_info.pdf]

Supporting Information for:

"Integrated Continuum Dielectric Approaches to treat Molecular Polarizability and the Condensed Phase: Refractive Index and Implicit Solvation"

Jean-François Truchon, Anthony Nicholls, Benoît Roux, Radu I. Iftimie and Christopher I. Bayly

Table S1. The atomic partial charges (atomic units) fitted with DRESP<sup>1</sup> on B3LYP/6-311++G(3df,3pd) electrostatic potential

|                   | 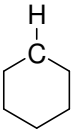 |       |  |      |  |      |       |                |                |                |                |  |      |       |      |                |                |                |                |  |       |       |      |
|-------------------|-----------------------------------------------------------------------------------|-------|-----------------------------------------------------------------------------------|------|-----------------------------------------------------------------------------------|------|-------|----------------|----------------|----------------|----------------|-------------------------------------------------------------------------------------|------|-------|------|----------------|----------------|----------------|----------------|-------------------------------------------------------------------------------------|-------|-------|------|
|                   | cyclohexane                                                                       |       | benzene                                                                           |      | pyridine                                                                          |      |       |                |                |                |                | N-methylacetamide                                                                   |      |       |      |                |                |                |                | dimethylsulfone                                                                     |       |       |      |
| Model             | C                                                                                 | H     | C                                                                                 | H    | N                                                                                 | C    | H     | C <sub>1</sub> | H <sub>1</sub> | C <sub>2</sub> | H <sub>2</sub> | O                                                                                   | C    | N     | H    | C <sub>1</sub> | H <sub>1</sub> | C <sub>2</sub> | H <sub>2</sub> | S                                                                                   | O     | C     | H    |
| $\epsilon_{in}=1$ | 0.05                                                                              | -0.02 | -0.12                                                                             | 0.12 | -0.73                                                                             | 0.59 | 0.00  | -0.66          | 0.21           | 0.40           | 0.05           | -0.57                                                                               | 0.80 | -0.44 | 0.28 | -0.19          | 0.11           | -0.96          | 0.25           | 1.03                                                                                | -0.50 | -0.77 | 0.25 |
| G1-4              | 0.05                                                                              | -0.02 | -0.25                                                                             | 0.25 | -1.31                                                                             | 1.05 | 0.02  | -1.19          | 0.39           | 0.66           | 0.10           | -0.93                                                                               | 1.49 | -0.90 | 0.52 | -0.39          | 0.19           | -1.63          | 0.41           | 1.75                                                                                | -0.81 | -1.11 | 0.35 |
| G1-12             | 0.14                                                                              | -0.07 | -0.42                                                                             | 0.42 | -2.11                                                                             | 1.72 | 0.03  | -1.93          | 0.65           | 0.99           | 0.17           | -1.40                                                                               | 2.71 | -1.59 | 0.85 | -0.81          | 0.35           | -2.97          | 0.73           | 3.02                                                                                | -1.20 | -2.24 | 0.64 |
| G1-24             | -0.23                                                                             | 0.12  | -0.54                                                                             | 0.54 | -2.63                                                                             | 2.27 | -0.02 | -2.57          | 0.87           | 1.35           | 0.17           | -1.72                                                                               | 3.51 | -2.01 | 1.08 | -1.23          | 0.49           | -4.33          | 1.08           | 4.14                                                                                | -1.50 | -3.51 | 0.98 |

<sup>1</sup>Truchon, J.-F.; Nicholls, A.; Grant, J. A.; Iftimie, R. I.; Roux, B.; Bayly, C. I. *Submitted 2008*
